# Supplementary material for: The murine lung microbiome in relation to the intestinal and vaginal bacterial communities
Source: PubMed Central journal article supplement (PMC3878784; doi:10.1186/1471-2180-13-303), 2013-12-28

A

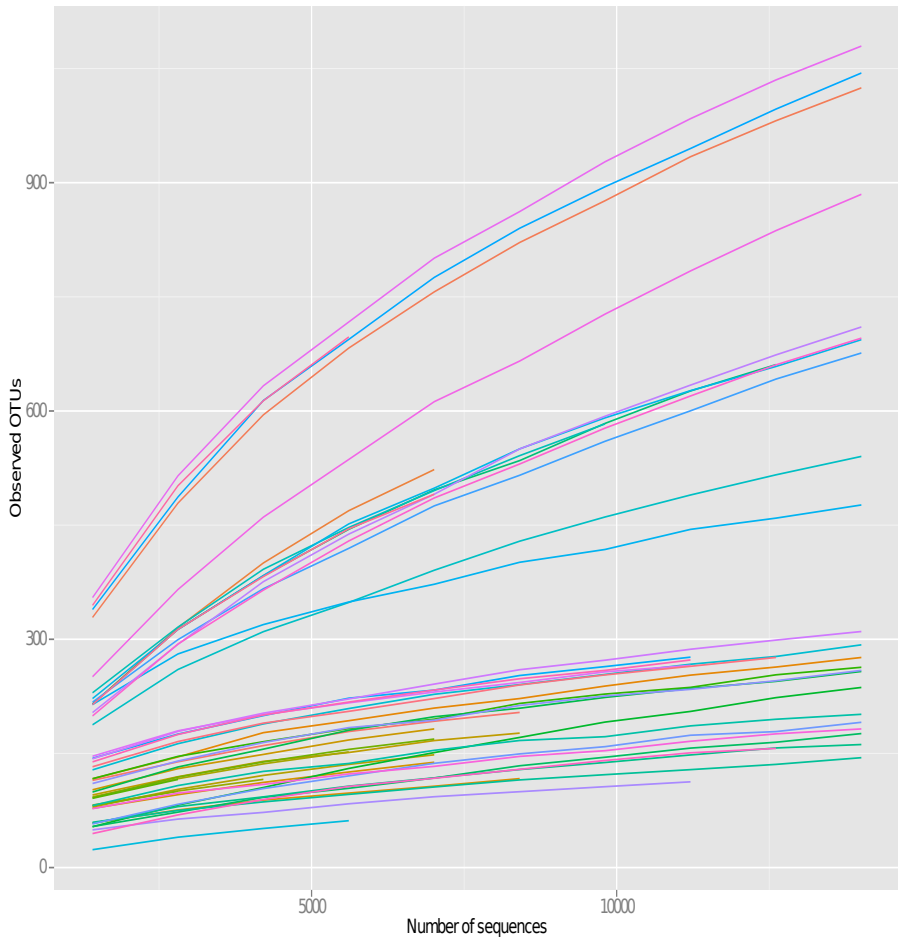

B

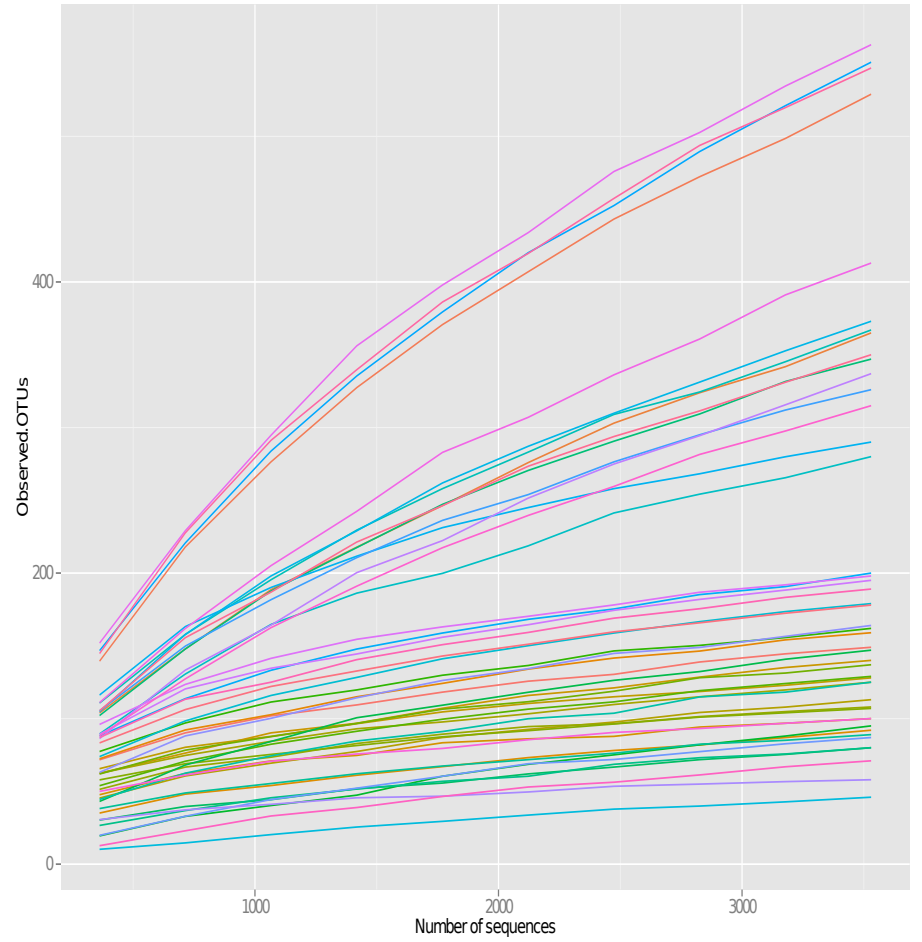

Supplement: 1471-2180-13-303-S1.pdf [file 1471-2180-13-303-S1.pdf]
