# Supplementary material for: The murine lung microbiome in relation to the intestinal and vaginal bacterial communities
Source: PubMed Central journal article supplement (PMC3878784; doi:10.1186/1471-2180-13-303), 2013-12-28

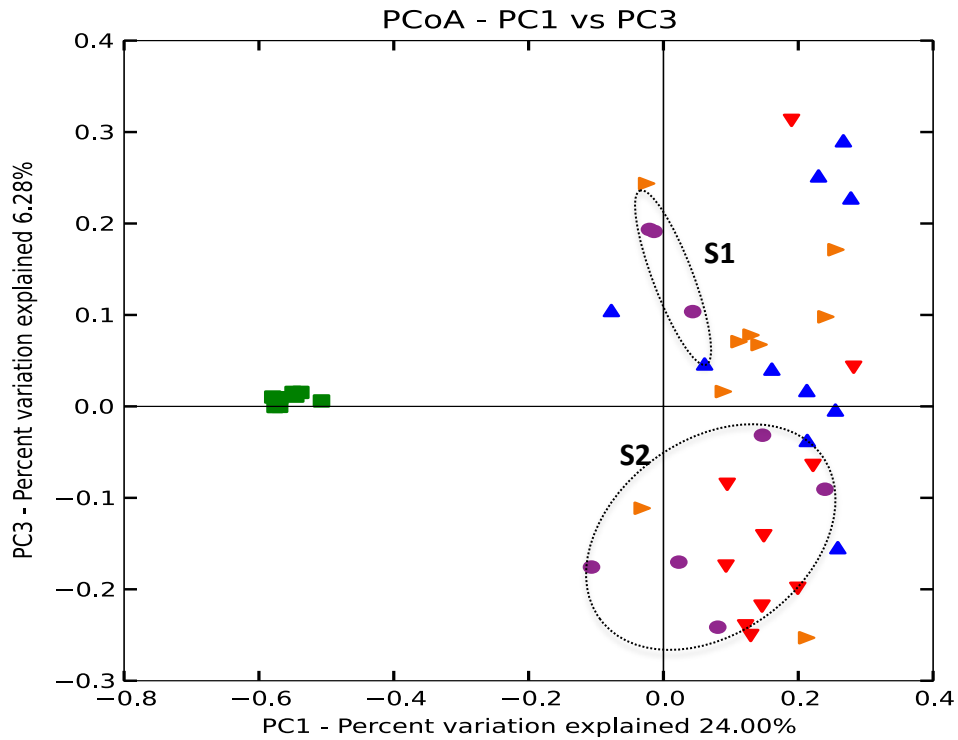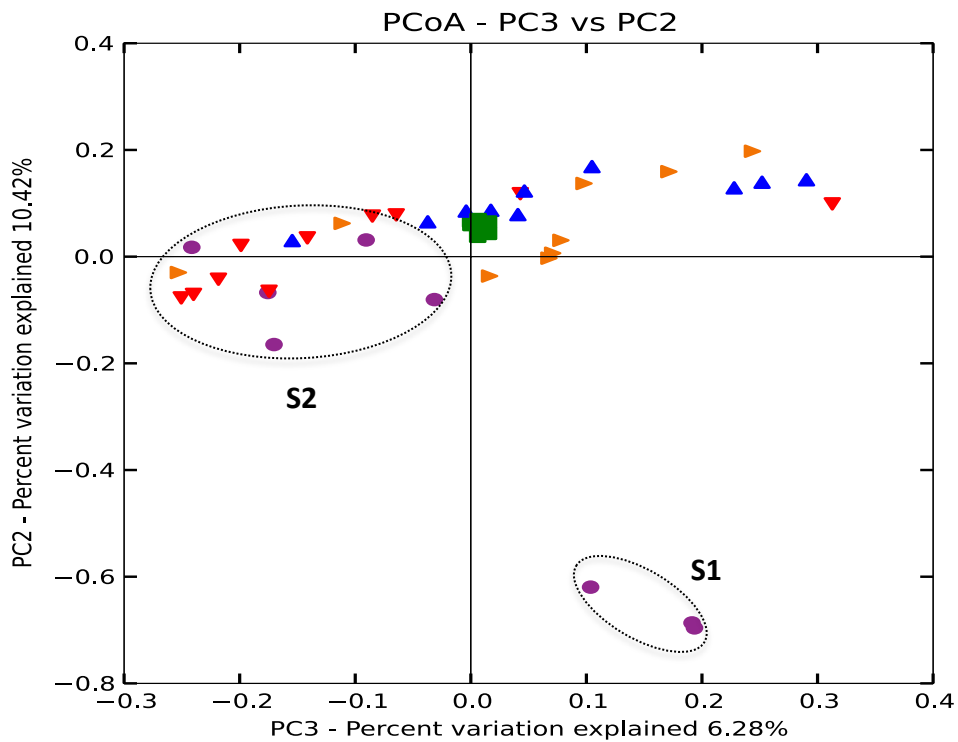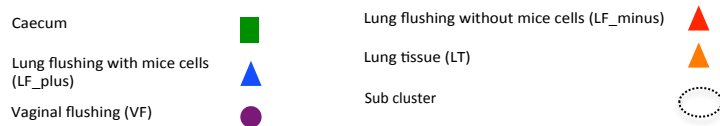

Supplement: 1471-2180-13-303-S4.pdf [file 1471-2180-13-303-S4.pdf]
